# Supplementary material
Source: publisher site journal article supplement (https://www.dovepress.com/article/415654)

**Supplement Figure 1** Scheme of the trabeculectomy performed in this study.

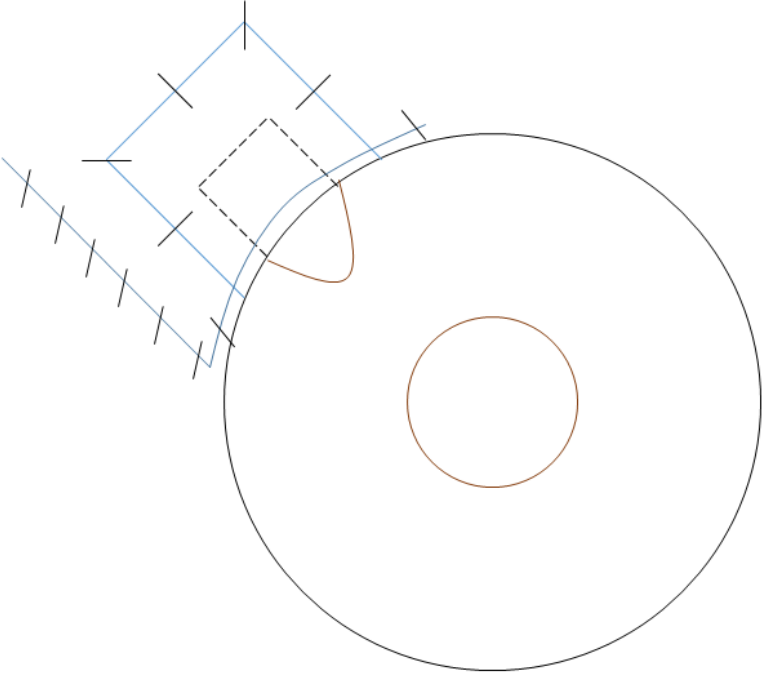

Supplement: Supplementary file 1 [file get_supplementary_file.php]
